# Supplementary material
Source: ML conference proceedings conference paper supplement (https://proceedings.mlr.press/v115/wang20e.html)
Supplement: Supplementary file 1 [file wang20e-supp.pdf]

## A PROOF OF LEMMA 2

*Proof.* The proof technique is standard, and can be found in Zinkevich (2003); Hazan et al. (2016).

First, we prove the regret bound of (21). Note that by Definition 2,  $s_t^\eta(\mathbf{x})$  is  $2\eta^2G^2$ -strongly convex. For convince, we denote  $\alpha_{t+1} = 1/(2\eta^2G^2t)$ ,  $\lambda^s = 2\eta^2G^2$ , and define the upper bound of the gradients of  $s_t^\eta(\mathbf{x})$  as

$$\max_{\mathbf{x} \in \mathcal{D}} \|\nabla s_t^\eta(\mathbf{x})\| = \max_{\mathbf{x} \in \mathcal{D}} \|\eta \mathbf{g}_t + 2\eta^2G^2(\mathbf{x} - \mathbf{x}_t)\| \leq G\eta + 2\eta^2G^2D =: G^s.$$

By the update rule of  $\mathbf{x}_{t+1}^{\eta,s}$ , we have

$$\begin{aligned} \|\mathbf{x}_{t+1}^{\eta,s} - \mathbf{u}\| &= \left\| \Pi_{\mathcal{D}}^{J_d}(\mathbf{x}_t^{\eta,s} - \alpha_{t+1} \nabla s_t^\eta(\mathbf{x}_t^{\eta,s})) - \mathbf{u} \right\| \\ &\leq \|\mathbf{x}_t^{\eta,s} - \alpha_{t+1} \nabla s_t^\eta(\mathbf{x}_t^{\eta,s}) - \mathbf{u}\| \\ &= \|\mathbf{x}_t^{\eta,s} - \mathbf{u}\|^2 + \alpha_{t+1}^2 \|\nabla s_t^\eta(\mathbf{x}_t^{\eta,s})\|^2 - 2\alpha_{t+1}(\mathbf{x}_t^{\eta,s} - \mathbf{u})^\top \nabla s_t^\eta(\mathbf{x}_t^{\eta,s}). \end{aligned} \quad (28)$$

Hence,

$$2(\mathbf{x}_t^{\eta,s} - \mathbf{u})^\top \nabla s_t^\eta(\mathbf{x}_t^{\eta,s}) \leq \frac{\|\mathbf{x}_t^{\eta,s} - \mathbf{u}\| - \|\mathbf{x}_{t+1}^{\eta,s} - \mathbf{u}\|^2}{\alpha_{t+1}} + \alpha_{t+1}(G^s)^2. \quad (29)$$

Summing over 1 to  $T$  and applying definition 2, we get

$$\begin{aligned} 2 \sum_{t=1}^T s_t^\eta(\mathbf{x}_t^{\eta,s}) - 2 \sum_{t=1}^T s_t^\eta(\mathbf{u}) &\leq \sum_{t=1}^T \|\mathbf{x}_t^{\eta,s} - \mathbf{u}\|^2 \left( \frac{1}{\alpha_{t+1}} - \frac{1}{\alpha_t} - \lambda^s \right) + (G^s)^2 \sum_{t=1}^T \alpha_{t+1} \\ &\leq \frac{(G^s)^2}{\lambda^s} (1 + \log T). \end{aligned} \quad (30)$$

Note that  $\eta \leq \frac{1}{5DG}$ . We have

$$(G^s)^2 = G^2\eta^2 + 4\eta^3G^3D + 4\eta^4G^4D^2 \leq G^2\eta^2 + \frac{4\eta^2G^2}{5} + \frac{4\eta^2G^2}{25} \leq 2\eta^2G^2 = \lambda^s. \quad (31)$$

Next, we prove the regret bound of (22). We start with the following inequality

$$\begin{aligned} \nabla \ell_t^\eta(\mathbf{x})(\nabla \ell_t^\eta(\mathbf{x}))^\top &= \eta^2 \mathbf{g}_t \mathbf{g}_t^\top + 4\eta^3 \mathbf{g}_t (\mathbf{x} - \mathbf{x}_t)^\top \mathbf{g}_t \mathbf{g}_t^\top + 4\eta^4 \mathbf{g}_t \mathbf{g}_t^\top (\mathbf{x} - \mathbf{x}_t) (\mathbf{x} - \mathbf{x}_t)^\top \mathbf{g}_t \mathbf{g}_t^\top \\ &= \eta^2 \mathbf{g}_t \mathbf{g}_t^\top + \mathbf{g}_t \left( 4\eta^3 (\mathbf{x} - \mathbf{x}_t)^\top \mathbf{g}_t + 4\eta^4 ((\mathbf{x} - \mathbf{x}_t)^\top \mathbf{g}_t)^2 \right) \mathbf{g}_t^\top \\ &\preceq 2\eta^2 \mathbf{g}_t \mathbf{g}_t^\top = \nabla^2 \ell_t^\eta(\mathbf{x}) \end{aligned} \quad (32)$$

where  $\nabla^2 \ell_t^\eta(\mathbf{x})$  denotes the Hessian matrix. The inequality implies that  $\nabla^2 \ell_t^\eta(\mathbf{x}) \succeq \nabla \ell_t^\eta(\mathbf{x})(\nabla \ell_t^\eta(\mathbf{x}))^\top$ . According to Lemma 4.1 in Hazan et al. (2016),  $\ell_t^\eta(\mathbf{x})$  is 1-exp-concave. Next, we prove that the gradient of  $\ell_t^\eta(\mathbf{x})$  can be upper bounded as follows

$$\max_{\mathbf{x} \in \mathcal{D}} \|\nabla \ell_t^\eta(\mathbf{x})\| \leq \eta G + 2\eta^2G^2D \leq \frac{7}{25D} = G^\ell. \quad (33)$$

By Theorem 4.3 in Hazan et al. (2016), we have

$$\sum_{t=1}^T \ell_t^\eta(\mathbf{x}_t^{\eta,\ell}) - \sum_{t=1}^T \ell_t^\eta(\mathbf{u}) \leq 5(1 + G^\ell D)d \log T \leq 10d \log T. \quad (34)$$

Finally, we prove the regret bound of (23). Note that the gradient of  $c_t(\mathbf{x})$  is upper bounded by  $\max_{\mathbf{x} \in \mathcal{D}} \|\nabla c_t(\mathbf{x})\| \leq \eta^c G$ . Define  $m_t = \frac{D}{\eta^c G \sqrt{t}}$ . By the convexity of  $c_t(\mathbf{x})$ , we have  $\forall \mathbf{u} \in \mathcal{D}$ ,

$$c_t(\mathbf{x}_t^c) - c_t(\mathbf{u}) \leq (\mathbf{x}_t^c - \mathbf{u})^\top \nabla c_t(\mathbf{x}_t^c). \quad (35)$$

On the other hand, according to the update rule of  $\mathbf{x}_{t+1}^c$ , we have

$$\begin{aligned}
\|\mathbf{x}_{t+1}^c - \mathbf{u}\|^2 &= \|\Pi_{\mathcal{D}}^{I_d}(\mathbf{x}_t^c - m_t \nabla c_t(\mathbf{x}_t^c)) - \mathbf{u}\|^2 \\
&\leq \|\mathbf{x}_t^c - m_t \nabla c_t(\mathbf{x}_t^c) - \mathbf{u}\|^2 \\
&= \|\mathbf{x}_t^c - \mathbf{u}\|^2 + m_t^2 \|\nabla c_t(\mathbf{x}_t^c)\|^2 - 2m_t (\mathbf{x}_t^c - \mathbf{u})^\top \nabla c_t(\mathbf{x}_t^c)
\end{aligned} \tag{36}$$

where the inequality follows from Theorem 2.1 in Hazan et al. (2016). Hence,

$$\begin{aligned}
&2 (\mathbf{x}_t^c - \mathbf{u})^\top \nabla c_t(\mathbf{x}_t^c) \\
&\leq \frac{\|\mathbf{x}_t^c - \mathbf{u}\|^2 - \|\mathbf{x}_{t+1}^c - \mathbf{u}\|^2}{m_t} + m_t \|\nabla c_t(\mathbf{x}_t^c)\|^2 \\
&\leq \frac{\|\mathbf{x}_t^c - \mathbf{u}\|^2 - \|\mathbf{x}_{t+1}^c - \mathbf{u}\|^2}{m_t} + m_t (\eta^c G)^2
\end{aligned} \tag{37}$$

Substituting the above inequality into (35) and summing over  $T$ , we have

$$\begin{aligned}
\sum_{t=1}^T c_t(\mathbf{x}_t^c) - c_t(\mathbf{u}) &\stackrel{(2)}{\leq} \sum_{t=1}^T (\mathbf{x}_t^c - \mathbf{u})^\top \nabla c_t(\mathbf{x}_t^c) \\
&\leq \frac{1}{2} \sum_{t=1}^T \|\mathbf{x}_t^c - \mathbf{u}\|^2 \left( \frac{1}{m_t} - \frac{1}{m_{t-1}} \right) + \frac{(\eta^c G)^2}{2} \sum_{t=1}^T m_t \\
&\leq D^2 \frac{1}{2m_T} + \frac{(\eta^c G)^2}{2} \sum_{t=1}^T m_t \\
&\leq \frac{3}{2} \eta^c G D \sqrt{T} \leq \frac{3}{4}
\end{aligned} \tag{38}$$

where the last inequality is due to  $\eta^c = \frac{1}{2GD\sqrt{T}}$ . □
